# Supplementary material
Source: PubMed Central journal article supplement (PMC5665717)
Supplement: NIHMS897177-supplement-10439_2017_1893_MOESM1_ESM.pdf [file NIHMS897177-supplement-10439_2017_1893_MOESM1_ESM.pdf]

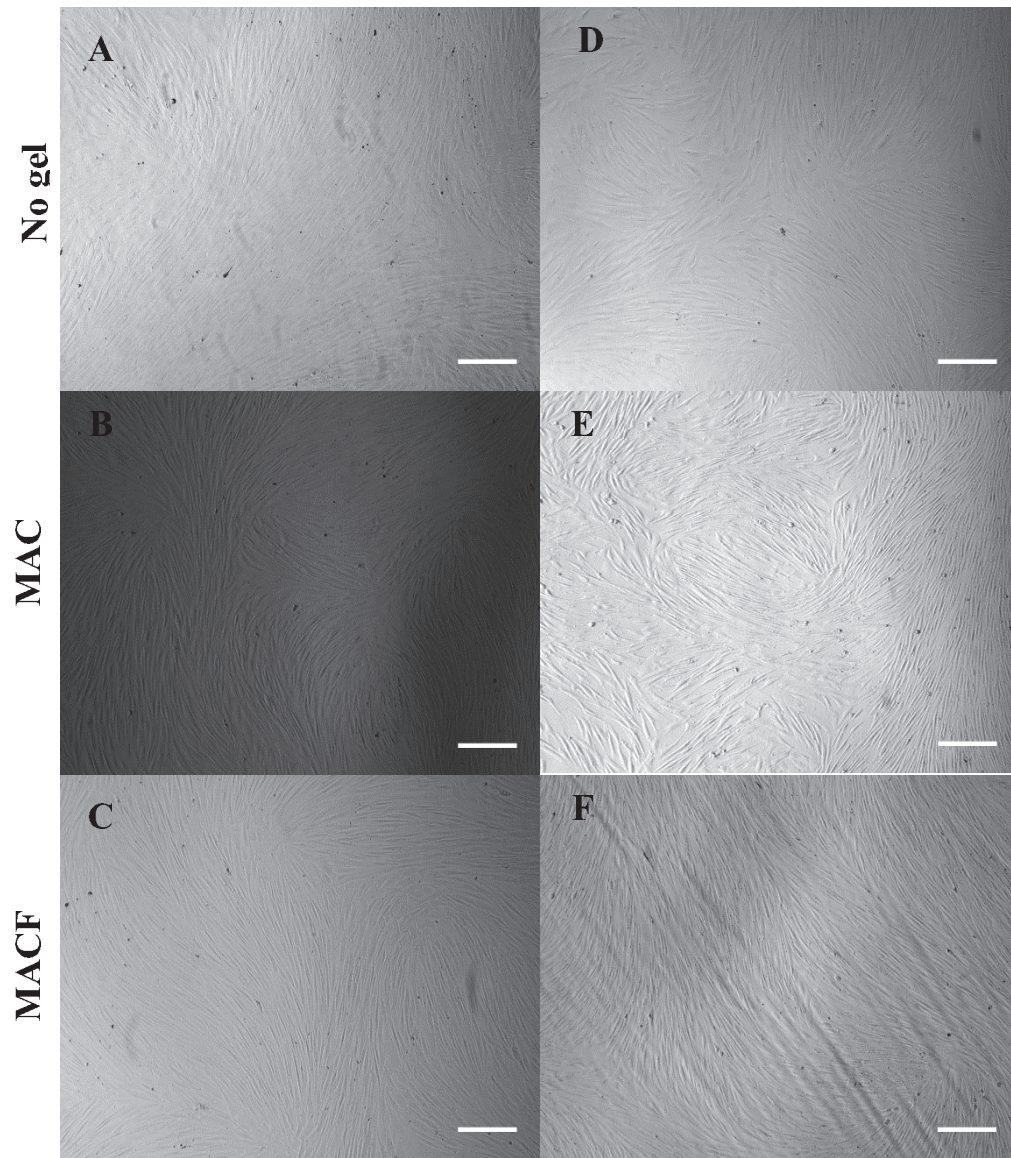

**Supplemental Figure 1.** Representative phase contrast images of neonatal human dermal fibroblasts grown under different treatments at 72 h. A, B, C were in normoxia (21% O<sub>2</sub>) and D, E, F were in hypoxia (1% O<sub>2</sub>). Scale bar is 200  $\mu$ m.

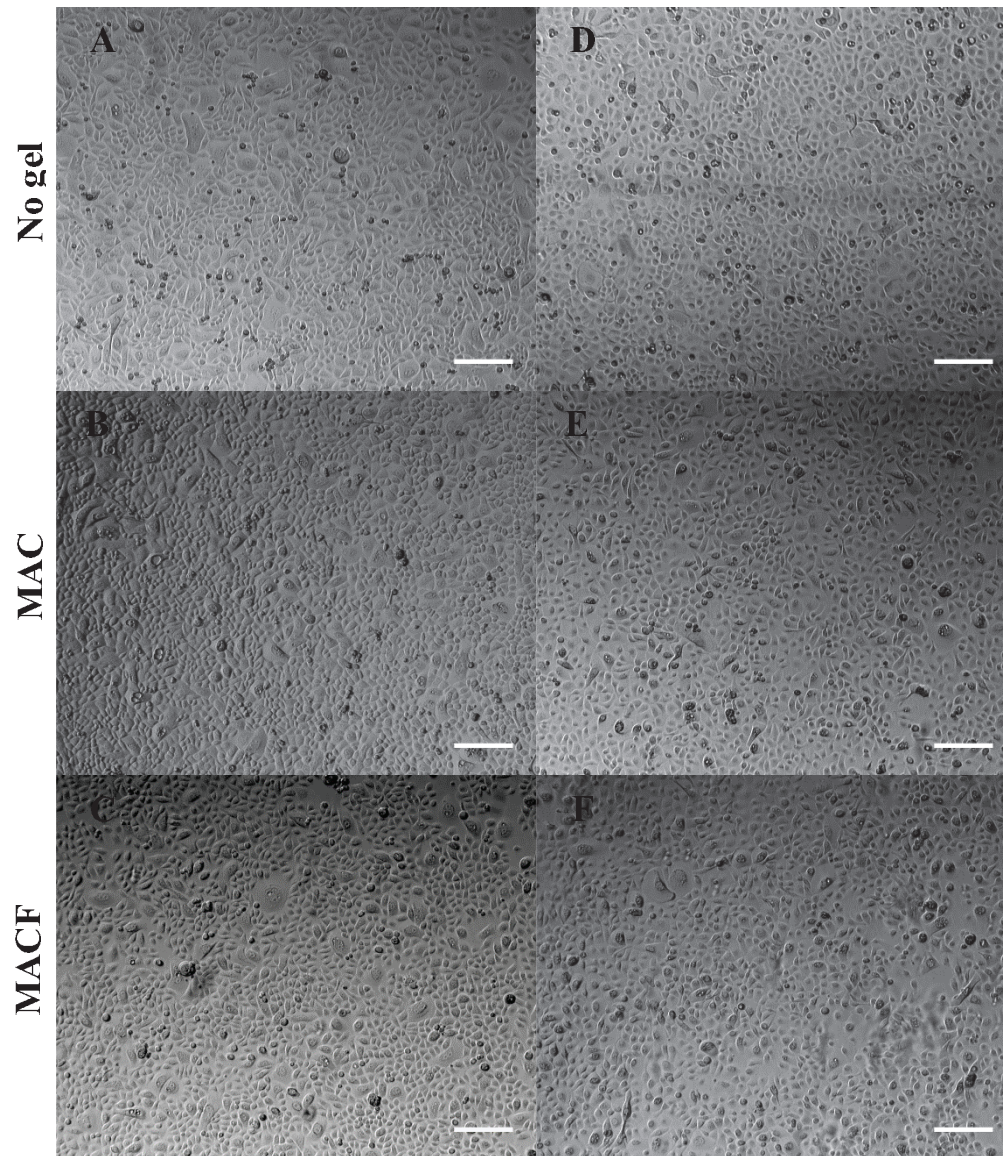

**Supplemental Figure 2.** Representative phase contrast images of neonatal human epidermal keratinocytes grown under different treatments at 72 h. A, B, C were in normoxia (21% O<sub>2</sub>) and D, E, F were in hypoxia (1% O<sub>2</sub>). Scale bar is 200 μm.
